# Supplementary material for: Drug–drug salts of mefenamic acid\tolfenamic acid and piperazine to improve physicochemical properties for potential veterinary use
Source: Royal Society of Chemistry journal article supplement (doi:10.1039/c9ce00781d), 2019-01-01
Supplement: c9ce00781d1.pdf [file c9ce00781d1.pdf]

Supporting Information for:

## Drug-drug Salts of Mefenamic Acid/Tolfenamic Acid and Piperazine to Improve Physicochemical Properties for Potential Veterinary Use

Xinyi Wang,<sup>ab</sup> Shijie Xu,<sup>ab</sup> Lina Jia,<sup>ab</sup> Yujia Yang,<sup>ab</sup> Yu Liu,<sup>ab</sup> Junbo Gong<sup>abc</sup> and Songgu Wu<sup>\*ab</sup>

<sup>a</sup> State Key Laboratory of Chemical Engineering, School of Chemical Engineering and Technology, Tianjin University, Weijin Road 92, Tianjin, 300072, P.R. China.

Email: wusonggu@tju.edu.cn

<sup>b</sup> Collaborative Innovation Center of Chemistry Science and Engineering, Weijin Road 92, Tianjin, P.R. China.

<sup>c</sup> Key Laboratory of Modern drug delivery and high efficiency in Tianjin University, Tianjin 300072, China

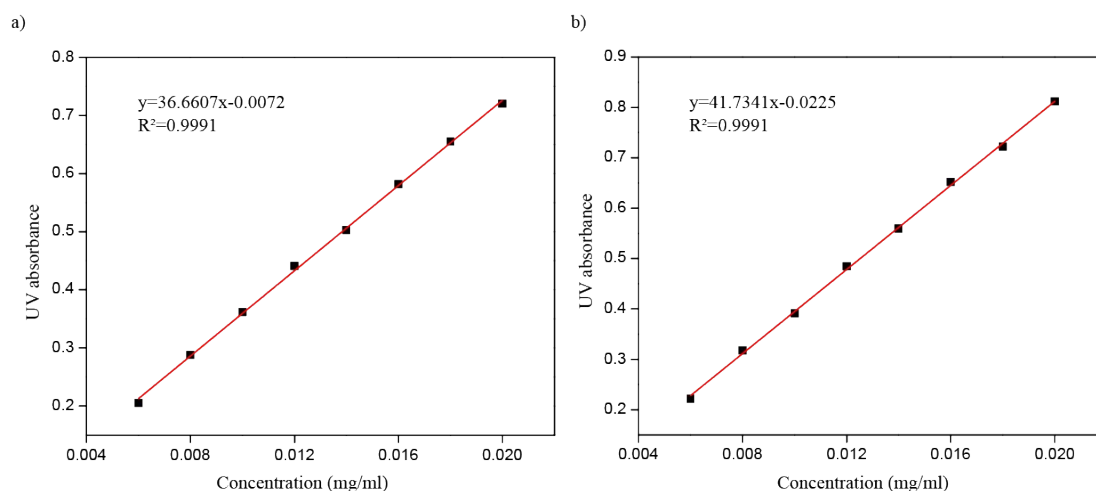

Fig. S1 The standard curves for the measurement of concentration. a) Mefenamic acid and b) Tolfenamic acid.

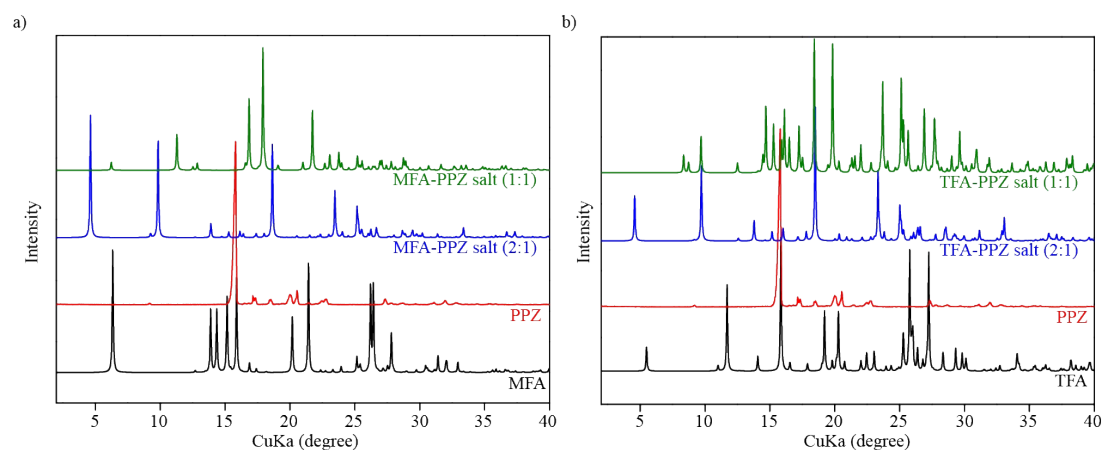

Figure. S2 The XRD patterns of raw materials and the new salts. a) The XRD patterns of MFA (black color), PPZ (red color), MFA-PPZ salt (2:1) (blue color) and MFA-PPZ salt (1:1) (green color). b) The XRD patterns of TFA (black color), PPZ (red color), TFA-PPZ salt (2:1) (blue color) and TFA-PPZ salt (1:1) (green color).

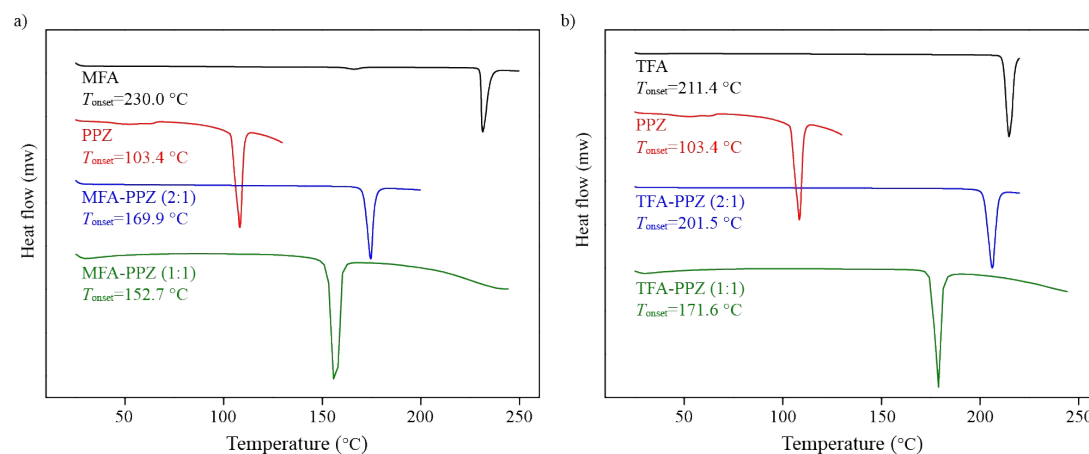

Figure. S3 The DSC of patterns of raw materials and the new salts. a) The DSC of patterns of MFA (black color), PPZ (red color), MFA-PPZ salt (2:1) (blue color) and MFA-PPZ salt (1:1) (green color). b) The DSC of patterns of TFA (black color), PPZ (red color), TFA-PPZ salt (2:1) (blue color) and TFA-PPZ salt (1:1) (green color).

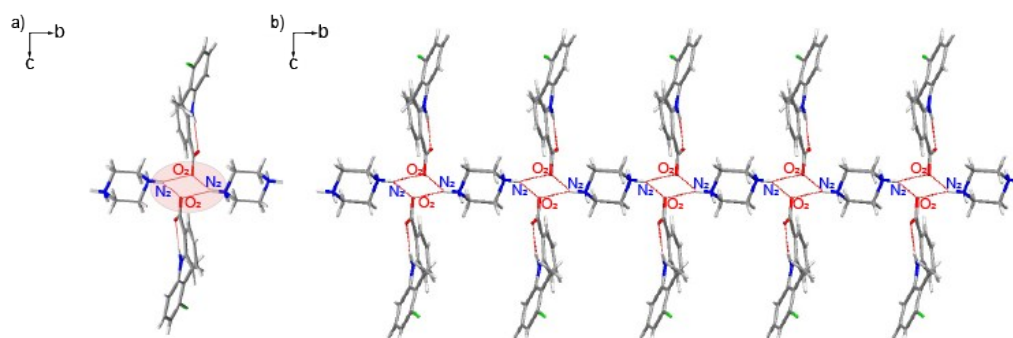

Figure. S4 The 1D structure of TFA-PPZ salt (2:1). a) The four-membered ring and b) the 1D chain.

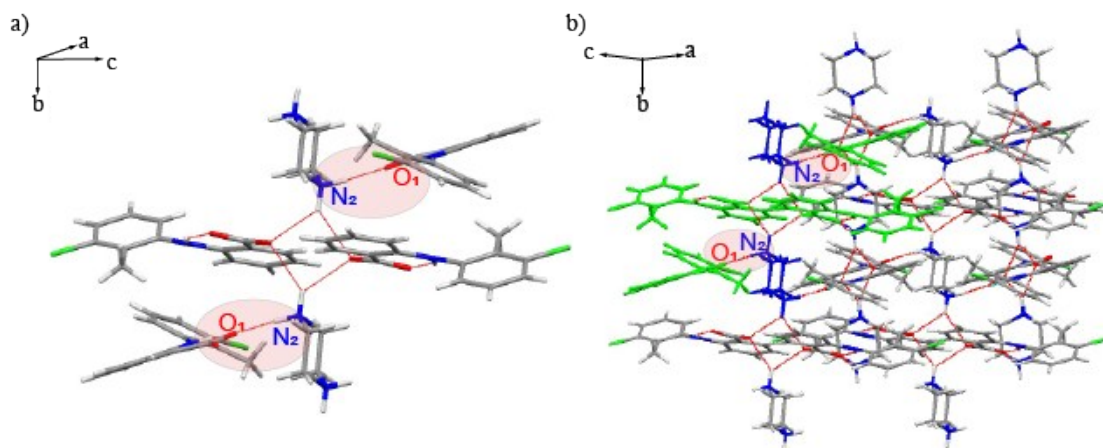

Figure. S5 The 2D structure of TFA-PPZ salt (2:1). a) The bond of connecting the 2D structure and b) the 2D plane.

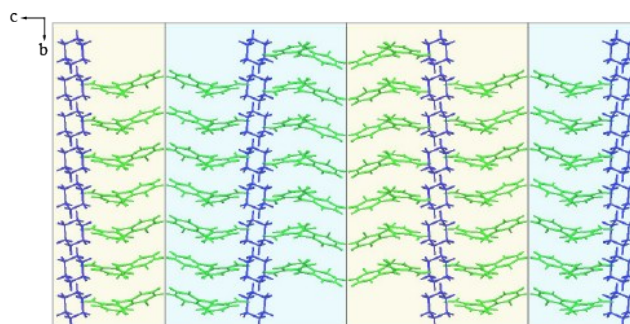

Figure. S6 The 3D packing of TFA-PPZ salt (2:1).

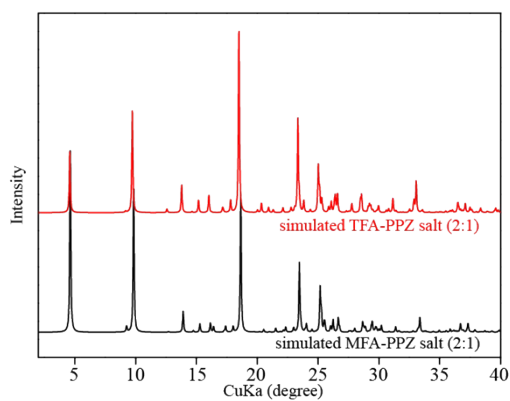

Figure. S7 The simulated XRD patterns of MFA-PPZ salt (2:1) and TFA-PPZ salt (2:1).

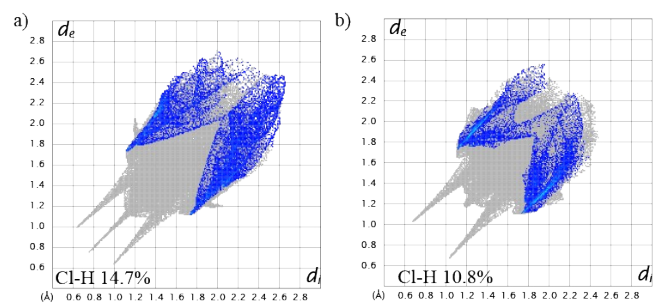

Figure. S8 The Hirshfeld 2D fingerprints of two salts. a) Cl-H interaction in TFA-PPZ salt (2:1); b) Cl-H interaction in TFA-PPZ salt (1:1).

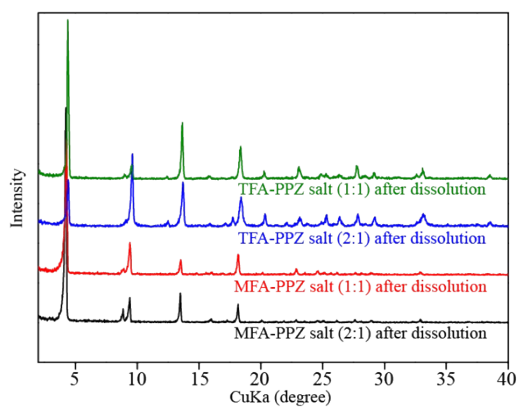

Figure. S9 The XRD patterns of the remaining solid in the powder dissolution experiment in water and ethanol.
